# Supplementary material for: Azithromycin vs. Placebo for the Clinical Outcome in Campylobacter concisus Diarrhoea in Adults: A Randomized, Double-Blinded, Placebo-Controlled Clinical Trial
Source: PubMed Central journal article supplement (PMC5125586; doi:10.1371/journal.pone.0166395), 2016-11-28
Supplement: pone.0166395.s005.pdf [file pone.0166395.s005.pdf]

**Spørgeskema dag 1**

Dato (ddmmyy) \_\_\_\_\_

Er du blevet rask: Ja , du behøver ikke at udfylde flere sider.  
Spørgeskemaet indsendes dag 10.  
Nej , udfyld venligst nedenstående og næste dag

Antal afføringer dags dato \_\_\_\_\_ Skriv antal

Jeg har indtaget forsøgsmedicin dags dato  (sæt kryds)

| Har du haft:<br>(Husk at afkrydse alle felter<br>med enten nej eller ja) | Nej                      | Ja                       | Evt. kommentarer                 |
|--------------------------------------------------------------------------|--------------------------|--------------------------|----------------------------------|
| Vandig afføring                                                          | <input type="checkbox"/> | <input type="checkbox"/> | _____                            |
| Slimet afføring                                                          | <input type="checkbox"/> | <input type="checkbox"/> | _____                            |
| Blodig afføring                                                          | <input type="checkbox"/> | <input type="checkbox"/> | _____                            |
| Natlig diarré                                                            | <input type="checkbox"/> | <input type="checkbox"/> | _____                            |
| Feber                                                                    | <input type="checkbox"/> | <input type="checkbox"/> | Temperatur _____ C°              |
| Kulderysteler                                                            | <input type="checkbox"/> | <input type="checkbox"/> | _____                            |
| Kvalme                                                                   | <input type="checkbox"/> | <input type="checkbox"/> | _____                            |
| Opkastning                                                               | <input type="checkbox"/> | <input type="checkbox"/> | Antal _____                      |
| Hovedpine                                                                | <input type="checkbox"/> | <input type="checkbox"/> | _____                            |
| Svimmelhed                                                               | <input type="checkbox"/> | <input type="checkbox"/> | _____                            |
| Mavesmerter                                                              | <input type="checkbox"/> | <input type="checkbox"/> | _____                            |
| Muskelsmerter                                                            | <input type="checkbox"/> | <input type="checkbox"/> | _____                            |
| Vægttab                                                                  | <input type="checkbox"/> | <input type="checkbox"/> | Hvis ja, din angiv vægt _____ kg |

Andre symptomer  
\_\_\_\_\_  
\_\_\_\_\_Bivirkninger:  Ja Nej Hvilken, hvilke  
\_\_\_\_\_  
\_\_\_\_\_

**Spørgeskema dag 2**

Dato (ddmmyy) \_\_\_\_\_

Er du blevet rask: Ja , du behøver ikke at udfylde flere sider.  
Spørgeskemaet indsendes dag 10.  
Nej , udfyld venligst nedenstående og næste dag

Antal afføringer dags dato \_\_\_\_\_ Skriv antal

Jeg har indtaget forsøgsmedicin dags dato  (sæt kryds)

| Har du haft:<br>(Husk at afkrydse alle felter<br>med enten nej eller ja) | Nej                      | Ja                       | Evt. kommentarer                 |
|--------------------------------------------------------------------------|--------------------------|--------------------------|----------------------------------|
| Vandig afføring                                                          | <input type="checkbox"/> | <input type="checkbox"/> | _____                            |
| Slimet afføring                                                          | <input type="checkbox"/> | <input type="checkbox"/> | _____                            |
| Blodig afføring                                                          | <input type="checkbox"/> | <input type="checkbox"/> | _____                            |
| Natlig diarré                                                            | <input type="checkbox"/> | <input type="checkbox"/> | _____                            |
| Feber                                                                    | <input type="checkbox"/> | <input type="checkbox"/> | Temperatur _____ C°              |
| Kulderystelser                                                           | <input type="checkbox"/> | <input type="checkbox"/> | _____                            |
| Kvalme                                                                   | <input type="checkbox"/> | <input type="checkbox"/> | _____                            |
| Opkastning                                                               | <input type="checkbox"/> | <input type="checkbox"/> | Antal _____                      |
| Hovedpine                                                                | <input type="checkbox"/> | <input type="checkbox"/> | _____                            |
| Svimmelhed                                                               | <input type="checkbox"/> | <input type="checkbox"/> | _____                            |
| Mavesmerter                                                              | <input type="checkbox"/> | <input type="checkbox"/> | _____                            |
| Muskelsmerter                                                            | <input type="checkbox"/> | <input type="checkbox"/> | _____                            |
| Vægttab                                                                  | <input type="checkbox"/> | <input type="checkbox"/> | Hvis ja, din angiv vægt _____ kg |

Andre symptomer  
\_\_\_\_\_  
\_\_\_\_\_Bivirkninger:  Ja Nej Hvilken, hvilke  
\_\_\_\_\_  
\_\_\_\_\_

**Spørgeskema dag 3**

Dato (ddmmyy) \_\_\_\_\_

Er du blevet rask: Ja , du behøver ikke at udfylde flere sider.  
Spørgeskemaet indsendes dag 10.  
Nej , udfyld venligst nedenstående og næste dag

Antal afføringer dags dato \_\_\_\_\_ Skriv antal

Jeg har indtaget forsøgsmedicin dags dato  (sæt kryds)

| Har du haft:<br>(Husk at afkrydse alle felter<br>med enten nej eller ja) | Nej                      | Ja                       | Evt. kommentarer                 |
|--------------------------------------------------------------------------|--------------------------|--------------------------|----------------------------------|
| Vandig afføring                                                          | <input type="checkbox"/> | <input type="checkbox"/> | _____                            |
| Slimet afføring                                                          | <input type="checkbox"/> | <input type="checkbox"/> | _____                            |
| Blodig afføring                                                          | <input type="checkbox"/> | <input type="checkbox"/> | _____                            |
| Natlig diarré                                                            | <input type="checkbox"/> | <input type="checkbox"/> | _____                            |
| Feber                                                                    | <input type="checkbox"/> | <input type="checkbox"/> | Temperatur _____ C°              |
| Kulderysteler                                                            | <input type="checkbox"/> | <input type="checkbox"/> | _____                            |
| Kvalme                                                                   | <input type="checkbox"/> | <input type="checkbox"/> | _____                            |
| Opkastning                                                               | <input type="checkbox"/> | <input type="checkbox"/> | Antal _____                      |
| Hovedpine                                                                | <input type="checkbox"/> | <input type="checkbox"/> | _____                            |
| Svimmelhed                                                               | <input type="checkbox"/> | <input type="checkbox"/> | _____                            |
| Mavesmerter                                                              | <input type="checkbox"/> | <input type="checkbox"/> | _____                            |
| Muskelsmerter                                                            | <input type="checkbox"/> | <input type="checkbox"/> | _____                            |
| Vægttab                                                                  | <input type="checkbox"/> | <input type="checkbox"/> | Hvis ja, din angiv vægt _____ kg |

Andre symptomer  
\_\_\_\_\_  
\_\_\_\_\_Bivirkninger:  Ja Nej Hvilken, hvilke  
\_\_\_\_\_  
\_\_\_\_\_

**Spørgeskema dag 4**

Dato (ddmmyy) \_\_\_\_\_

Er du blevet rask: Ja , du behøver ikke at udfylde flere sider.  
Spørgeskemaet indsendes dag 10.  
Nej , udfyld venligst nedenstående og næste dag

Antal afføringer dags dato \_\_\_\_\_ Skriv antal

Har du haft:  
(Husk at afkrydse alle felter  
med enten nej eller ja)

Nej Ja

Evt. kommentarer

Vandig afføring

Slimet afføring

Blodig afføring

Natlig diarré

Feber

Temperatur \_\_\_\_\_ C°

Kulderysteler

Kvalme

Opkastning

Antal \_\_\_\_\_

Hovedpine

Svimmelhed

Mavesmerter

Muskelsmerter

Vægttab

Hvis ja, din angiv vægt \_\_\_\_\_ kg

Andre symptomer

Bivirkninger:  Ja Nej 

Hvilken, hvilke

**Spørgeskema dag 5**

Dato (ddmmyy) \_\_\_\_\_

Er du blevet rask: Ja , du behøver ikke at udfylde flere sider.  
Spørgeskemaet indsendes dag 10.  
Nej , udfyld venligst nedenstående og næste dag

Antal afføringer dags dato \_\_\_\_\_ Skriv antal

Har du haft:  
(Husk at afkrydse alle felter  
med enten nej eller ja)

Nej Ja

Evt. kommentarer

Vandig afføring

Slimet afføring

Blodig afføring

Natlig diarré

Feber

Temperatur \_\_\_\_\_ C°

Kulderysteler

Kvalme

Opkastning

Antal \_\_\_\_\_

Hovedpine

Svimmelhed

Mavesmerter

Muskelsmerter

Vægttab

Hvis ja, din angiv vægt \_\_\_\_\_ kg

Andre symptomer

Bivirkninger:  Ja Nej 

Hvilken, hvilke

**Spørgeskema dag 6**

Dato (ddmmyy) \_\_\_\_\_

Er du blevet rask: Ja , du behøver ikke at udfylde flere sider.  
Spørgeskemaet indsendes dag 10.  
Nej , udfyld venligst nedenstående og næste dag

Antal afføringer dags dato \_\_\_\_\_ Skriv antal

Har du haft:  
(Husk at afkrydse alle felter  
med enten nej eller ja)

Nej Ja

Evt. kommentarer

Vandig afføring

Slimet afføring

Blodig afføring

Natlig diarré

Feber

Temperatur \_\_\_\_\_ C°

Kulderysteler

Kvalme

Opkastning

Antal \_\_\_\_\_

Hovedpine

Svimmelhed

Mavesmerter

Muskelsmerter

Vægttab

Hvis ja, din angiv vægt \_\_\_\_\_ kg

Andre symptomer

Bivirkninger:  Ja Nej 

Hvilken, hvilke

**Spørgeskema dag 7**

Dato (ddmmyy) \_\_\_\_\_

Er du blevet rask: Ja , du behøver ikke at udfylde flere sider.  
Spørgeskemaet indsendes dag 10.  
Nej , udfyld venligst nedenstående og næste dag

Antal afføringer dags dato \_\_\_\_\_ Skriv antal

Har du haft:  
(Husk at afkrydse alle felter  
med enten nej eller ja)

Nej Ja

Evt. kommentarer

Vandig afføring

Slimet afføring

Blodig afføring

Natlig diarré

Feber

Temperatur \_\_\_\_\_ C°

Kulderysteler

Kvalme

Opkastning

Antal \_\_\_\_\_

Hovedpine

Svimmelhed

Mavesmerter

Muskelsmerter

Vægttab

Hvis ja, din angiv vægt \_\_\_\_\_ kg

Andre symptomer

Bivirkninger:  Ja Nej 

Hvilken, hvilke

**Spørgeskema dag 8**

Dato (ddmmyy) \_\_\_\_\_

Er du blevet rask: Ja , du behøver ikke at udfylde flere sider.  
Spørgeskemaet indsendes dag 10.  
Nej , udfyld venligst nedenstående og næste dag

Antal afføringer dags dato \_\_\_\_\_ Skriv antal

Har du haft:  
(Husk at afkrydse alle felter  
med enten nej eller ja)

Nej Ja

Evt. kommentarer

Vandig afføring  Slimet afføring  Blodig afføring  Natlig diarré  Feber  

Temperatur \_\_\_\_\_ C°

Kulderysteler  Kvalme  

Antal \_\_\_\_\_

Opkastning  Hovedpine  Svimmelhed  Mavesmerter  Muskelsmerter  Vægttab  

Hvis ja, din angiv vægt \_\_\_\_\_ kg

Andre symptomer \_\_\_\_\_

Bivirkninger:  Ja Nej 

Hvilken, hvilke \_\_\_\_\_



**Spørgeskema dag 9**

Dato (ddmmyy) \_\_\_\_\_

Er du blevet rask: Ja , du behøver ikke at udfylde flere sider.  
Spørgeskemaet indsendes dag 10.  
Nej , udfyld venligst nedenstående og næste dag

Antal afføringer dags dato \_\_\_\_\_ Skriv antal

Har du haft:  
(Husk at afkrydse alle felter  
med enten nej eller ja)

Nej Ja

Evt. kommentarer

Vandig afføring

Slimet afføring

Blodig afføring

Natlig diarré

Feber

Temperatur \_\_\_\_\_ C°

Kulderysteler

Kvalme

Opkastning

Antal \_\_\_\_\_

Hovedpine

Svimmelhed

Mavesmerter

Muskelsmerter

Vægttab

Hvis ja, din angiv vægt \_\_\_\_\_ kg

Andre symptomer

Bivirkninger:  Ja Nej 

Hvilken, hvilke

**Spørgeskema dag 10**

Dato (ddmmyy) \_\_\_\_\_

Er du blevet rask: Ja , du behøver ikke at udfylde flere sider.  
Spørgeskemaet indsendes dag 10.  
Nej , udfyld venligst nedenstående og næste dag

Antal afføringer dags dato \_\_\_\_\_ Skriv antal

Har du haft:  
(Husk at afkrydse alle felter  
med enten nej eller ja)

Nej Ja

Evt. kommentarer

Vandig afføring

Slimet afføring

Blodig afføring

Natlig diarré

Feber

Temperatur \_\_\_\_\_ C°

Kulderysteler

Kvalme

Opkastning

Antal \_\_\_\_\_

Hovedpine

Svimmelhed

Mavesmerter

Muskelsmerter

Vægttab

Hvis ja, din angiv vægt \_\_\_\_\_ kg

Andre symptomer

Bivirkninger:  Ja Nej 

Hvilken, hvilke
