# Supplementary material for: Azithromycin vs. Placebo for the Clinical Outcome in Campylobacter concisus Diarrhoea in Adults: A Randomized, Double-Blinded, Placebo-Controlled Clinical Trial
Source: PubMed Central journal article supplement (PMC5125586; doi:10.1371/journal.pone.0166395), 2016-11-28
Supplement: pone.0166395.s006.pdf [file pone.0166395.s006.pdf]

**Questionnaire Day 1**

Date (ddmmyy) \_\_\_\_\_

Are you cured:      Yes , You do not have to fill the next pages

                                         No , Please complete below and the following day

Number of stools a day \_\_\_\_\_(numbers)

I have taken the study medication  (tick)

| Have you had:       | No                       | Yes                      | Further comments             |
|---------------------|--------------------------|--------------------------|------------------------------|
| Watery stools       | <input type="checkbox"/> | <input type="checkbox"/> | _____                        |
| Mucus in stools     | <input type="checkbox"/> | <input type="checkbox"/> | _____                        |
| Blood in stools     | <input type="checkbox"/> | <input type="checkbox"/> | _____                        |
| Nocturnal diarrhoea | <input type="checkbox"/> | <input type="checkbox"/> | _____                        |
| Fever               | <input type="checkbox"/> | <input type="checkbox"/> | Temperatur_____C°            |
| Chills              | <input type="checkbox"/> | <input type="checkbox"/> | _____                        |
| Nausea              | <input type="checkbox"/> | <input type="checkbox"/> | _____                        |
| Vomiting            | <input type="checkbox"/> | <input type="checkbox"/> | Numbers_____                 |
| Headache            | <input type="checkbox"/> | <input type="checkbox"/> | _____                        |
| Dizziness           | <input type="checkbox"/> | <input type="checkbox"/> | _____                        |
| Abdominal pain      | <input type="checkbox"/> | <input type="checkbox"/> | _____                        |
| Muscle aches        | <input type="checkbox"/> | <input type="checkbox"/> | _____                        |
| Weight loss         | <input type="checkbox"/> | <input type="checkbox"/> | If yes, write weight _____kg |

Other symptoms

\_\_\_\_\_

Side effects     Yes                       No 

Please explain:

\_\_\_\_\_

\_\_\_\_\_

**Questionnaire Day 2**

Date (ddmmyy) \_\_\_\_\_

Are you cured:      Yes , You do not have to fill the next pages

                                         No , Please complete below and the following day

Number of stools a day \_\_\_\_\_(numbers)

I have taken the study medication  (tick)

| Have you had:       | No                       | Yes                      | Further comments             |
|---------------------|--------------------------|--------------------------|------------------------------|
| Watery stools       | <input type="checkbox"/> | <input type="checkbox"/> | _____                        |
| Mucus in stools     | <input type="checkbox"/> | <input type="checkbox"/> | _____                        |
| Blood in stools     | <input type="checkbox"/> | <input type="checkbox"/> | _____                        |
| Nocturnal diarrhoea | <input type="checkbox"/> | <input type="checkbox"/> | _____                        |
| Fever               | <input type="checkbox"/> | <input type="checkbox"/> | Temperatur_____C°            |
| Chills              | <input type="checkbox"/> | <input type="checkbox"/> | _____                        |
| Nausea              | <input type="checkbox"/> | <input type="checkbox"/> | _____                        |
| Vomiting            | <input type="checkbox"/> | <input type="checkbox"/> | Numbers_____                 |
| Headache            | <input type="checkbox"/> | <input type="checkbox"/> | _____                        |
| Dizziness           | <input type="checkbox"/> | <input type="checkbox"/> | _____                        |
| Abdominal pain      | <input type="checkbox"/> | <input type="checkbox"/> | _____                        |
| Muscle aches        | <input type="checkbox"/> | <input type="checkbox"/> | _____                        |
| Weight loss         | <input type="checkbox"/> | <input type="checkbox"/> | If yes, write weight _____kg |

Other symptoms  
\_\_\_\_\_

Side effects     Yes                     No       Please explain:

\_\_\_\_\_

\_\_\_\_\_

**Questionnaire Day 3**

Date (ddmmyy) \_\_\_\_\_

Are you cured:      Yes , You do not have to fill the next pages

                                         No , Please complete below and the following day

Number of stools a day \_\_\_\_\_(numbers)

I have taken the study medication  (tick)

| Have you had:       | No                       | Yes                      | Further comments             |
|---------------------|--------------------------|--------------------------|------------------------------|
| Watery stools       | <input type="checkbox"/> | <input type="checkbox"/> | _____                        |
| Mucus in stools     | <input type="checkbox"/> | <input type="checkbox"/> | _____                        |
| Blood in stools     | <input type="checkbox"/> | <input type="checkbox"/> | _____                        |
| Nocturnal diarrhoea | <input type="checkbox"/> | <input type="checkbox"/> | _____                        |
| Fever               | <input type="checkbox"/> | <input type="checkbox"/> | Temperatur_____C°            |
| Chills              | <input type="checkbox"/> | <input type="checkbox"/> | _____                        |
| Nausea              | <input type="checkbox"/> | <input type="checkbox"/> | _____                        |
| Vomiting            | <input type="checkbox"/> | <input type="checkbox"/> | Numbers_____                 |
| Headache            | <input type="checkbox"/> | <input type="checkbox"/> | _____                        |
| Dizziness           | <input type="checkbox"/> | <input type="checkbox"/> | _____                        |
| Abdominal pain      | <input type="checkbox"/> | <input type="checkbox"/> | _____                        |
| Muscle aches        | <input type="checkbox"/> | <input type="checkbox"/> | _____                        |
| Weight loss         | <input type="checkbox"/> | <input type="checkbox"/> | If yes, write weight _____kg |

Other symptoms

\_\_\_\_\_

Side effects     Yes                     No 

Please explain:

\_\_\_\_\_

\_\_\_\_\_



**Questionnaire Day 5**

Date (ddmmyy) \_\_\_\_\_

Are you cured: Yes , You do not have to fill the next pagesNo , Please complete below and the following day

Number of stools a day \_\_\_\_\_ (numbers)

| Have you had:       | No                       | Yes                      | Further comments              |
|---------------------|--------------------------|--------------------------|-------------------------------|
| Watery stools       | <input type="checkbox"/> | <input type="checkbox"/> | _____                         |
| Mucus in stools     | <input type="checkbox"/> | <input type="checkbox"/> | _____                         |
| Blood in stools     | <input type="checkbox"/> | <input type="checkbox"/> | _____                         |
| Nocturnal diarrhoea | <input type="checkbox"/> | <input type="checkbox"/> | _____                         |
| Fever               | <input type="checkbox"/> | <input type="checkbox"/> | Temperatur _____ C°           |
| Chills              | <input type="checkbox"/> | <input type="checkbox"/> | _____                         |
| Nausea              | <input type="checkbox"/> | <input type="checkbox"/> | _____                         |
| Vomiting            | <input type="checkbox"/> | <input type="checkbox"/> | Numbers _____                 |
| Headache            | <input type="checkbox"/> | <input type="checkbox"/> | _____                         |
| Dizziness           | <input type="checkbox"/> | <input type="checkbox"/> | _____                         |
| Abdominal pain      | <input type="checkbox"/> | <input type="checkbox"/> | _____                         |
| Muscle aches        | <input type="checkbox"/> | <input type="checkbox"/> | _____                         |
| Weight loss         | <input type="checkbox"/> | <input type="checkbox"/> | If yes, write weight _____ kg |

Other symptoms  
\_\_\_\_\_Side effects  Yes  No  Please explain:  
\_\_\_\_\_  
\_\_\_\_\_

**Questionnaire Day 6**

Date (ddmmyy) \_\_\_\_\_

Are you cured: Yes , You do not have to fill the next pagesNo , Please complete below and the following day

Number of stools a day \_\_\_\_\_ (numbers)

| Have you had:       | No                       | Yes                      | Further comments              |
|---------------------|--------------------------|--------------------------|-------------------------------|
| Watery stools       | <input type="checkbox"/> | <input type="checkbox"/> | _____                         |
| Mucus in stools     | <input type="checkbox"/> | <input type="checkbox"/> | _____                         |
| Blood in stools     | <input type="checkbox"/> | <input type="checkbox"/> | _____                         |
| Nocturnal diarrhoea | <input type="checkbox"/> | <input type="checkbox"/> | _____                         |
| Fever               | <input type="checkbox"/> | <input type="checkbox"/> | Temperatur _____ C°           |
| Chills              | <input type="checkbox"/> | <input type="checkbox"/> | _____                         |
| Nausea              | <input type="checkbox"/> | <input type="checkbox"/> | _____                         |
| Vomiting            | <input type="checkbox"/> | <input type="checkbox"/> | Numbers _____                 |
| Headache            | <input type="checkbox"/> | <input type="checkbox"/> | _____                         |
| Dizziness           | <input type="checkbox"/> | <input type="checkbox"/> | _____                         |
| Abdominal pain      | <input type="checkbox"/> | <input type="checkbox"/> | _____                         |
| Muscle aches        | <input type="checkbox"/> | <input type="checkbox"/> | _____                         |
| Weight loss         | <input type="checkbox"/> | <input type="checkbox"/> | If yes, write weight _____ kg |

Other symptoms  
\_\_\_\_\_Side effects  Yes  No  Please explain:  
\_\_\_\_\_  
\_\_\_\_\_

**Questionnaire Day 7**

Date (ddmmyy) \_\_\_\_\_

Are you cured: Yes , You do not have to fill the next pagesNo , Please complete below and the following day

Number of stools a day \_\_\_\_\_ (numbers)

| Have you had:       | No                       | Yes                      | Further comments              |
|---------------------|--------------------------|--------------------------|-------------------------------|
| Watery stools       | <input type="checkbox"/> | <input type="checkbox"/> | _____                         |
| Mucus in stools     | <input type="checkbox"/> | <input type="checkbox"/> | _____                         |
| Blood in stools     | <input type="checkbox"/> | <input type="checkbox"/> | _____                         |
| Nocturnal diarrhoea | <input type="checkbox"/> | <input type="checkbox"/> | _____                         |
| Fever               | <input type="checkbox"/> | <input type="checkbox"/> | Temperatur _____ C°           |
| Chills              | <input type="checkbox"/> | <input type="checkbox"/> | _____                         |
| Nausea              | <input type="checkbox"/> | <input type="checkbox"/> | _____                         |
| Vomiting            | <input type="checkbox"/> | <input type="checkbox"/> | Numbers _____                 |
| Headache            | <input type="checkbox"/> | <input type="checkbox"/> | _____                         |
| Dizziness           | <input type="checkbox"/> | <input type="checkbox"/> | _____                         |
| Abdominal pain      | <input type="checkbox"/> | <input type="checkbox"/> | _____                         |
| Muscle aches        | <input type="checkbox"/> | <input type="checkbox"/> | _____                         |
| Weight loss         | <input type="checkbox"/> | <input type="checkbox"/> | If yes, write weight _____ kg |

Other symptoms  
\_\_\_\_\_Side effects  Yes  No  Please explain:  
\_\_\_\_\_  
\_\_\_\_\_

**Questionnaire Day 8**

Date (ddmmyy) \_\_\_\_\_

Are you cured: Yes , You do not have to fill the next pagesNo , Please complete below and the following day

Number of stools a day \_\_\_\_\_ (numbers)

| Have you had:       | No                       | Yes                      | Further comments              |
|---------------------|--------------------------|--------------------------|-------------------------------|
| Watery stools       | <input type="checkbox"/> | <input type="checkbox"/> | _____                         |
| Mucus in stools     | <input type="checkbox"/> | <input type="checkbox"/> | _____                         |
| Blood in stools     | <input type="checkbox"/> | <input type="checkbox"/> | _____                         |
| Nocturnal diarrhoea | <input type="checkbox"/> | <input type="checkbox"/> | _____                         |
| Fever               | <input type="checkbox"/> | <input type="checkbox"/> | Temperatur _____ C°           |
| Chills              | <input type="checkbox"/> | <input type="checkbox"/> | _____                         |
| Nausea              | <input type="checkbox"/> | <input type="checkbox"/> | _____                         |
| Vomiting            | <input type="checkbox"/> | <input type="checkbox"/> | Numbers _____                 |
| Headache            | <input type="checkbox"/> | <input type="checkbox"/> | _____                         |
| Dizziness           | <input type="checkbox"/> | <input type="checkbox"/> | _____                         |
| Abdominal pain      | <input type="checkbox"/> | <input type="checkbox"/> | _____                         |
| Muscle aches        | <input type="checkbox"/> | <input type="checkbox"/> | _____                         |
| Weight loss         | <input type="checkbox"/> | <input type="checkbox"/> | If yes, write weight _____ kg |

Other symptoms  
\_\_\_\_\_Side effects  Yes  No  Please explain:  
\_\_\_\_\_  
\_\_\_\_\_



**Questionnaire Day 9**

Date (ddmmyy) \_\_\_\_\_

Are you cured: Yes , You do not have to fill the next pagesNo , Please complete below and the following day

Number of stools a day \_\_\_\_\_ (numbers)

| Have you had:       | No                       | Yes                      | Further comments              |
|---------------------|--------------------------|--------------------------|-------------------------------|
| Watery stools       | <input type="checkbox"/> | <input type="checkbox"/> | _____                         |
| Mucus in stools     | <input type="checkbox"/> | <input type="checkbox"/> | _____                         |
| Blood in stools     | <input type="checkbox"/> | <input type="checkbox"/> | _____                         |
| Nocturnal diarrhoea | <input type="checkbox"/> | <input type="checkbox"/> | _____                         |
| Fever               | <input type="checkbox"/> | <input type="checkbox"/> | Temperatur _____ C°           |
| Chills              | <input type="checkbox"/> | <input type="checkbox"/> | _____                         |
| Nausea              | <input type="checkbox"/> | <input type="checkbox"/> | _____                         |
| Vomiting            | <input type="checkbox"/> | <input type="checkbox"/> | Numbers _____                 |
| Headache            | <input type="checkbox"/> | <input type="checkbox"/> | _____                         |
| Dizziness           | <input type="checkbox"/> | <input type="checkbox"/> | _____                         |
| Abdominal pain      | <input type="checkbox"/> | <input type="checkbox"/> | _____                         |
| Muscle aches        | <input type="checkbox"/> | <input type="checkbox"/> | _____                         |
| Weight loss         | <input type="checkbox"/> | <input type="checkbox"/> | If yes, write weight _____ kg |

Other symptoms  
\_\_\_\_\_Side effects  Yes  No  Please explain:  
\_\_\_\_\_  
\_\_\_\_\_
